# Supplementary material for: Influence of Genetic Risk Factors on Coronary Heart Disease Occurrence in Afro-Caribbeans
Source: PubMed Central journal article supplement (PMC4977013; doi:10.1016/j.cjca.2016.01.004), 2016-08
Supplement: mmc1.pdf [file mmc1.pdf]

**Supplemental table S1: Risk allele frequencies of 19 reported CHD SNP in Afro-Caribbean cases and controls**

| SNP        | Chromosome | Gene                      | Alleles        | Call rate | Risk allele frequency |                   |       |
|------------|------------|---------------------------|----------------|-----------|-----------------------|-------------------|-------|
|            |            |                           | Risk/reference | %         | Cases<br>N=178        | Controls<br>N=359 | p     |
| rs4341     | 17q23      | <i>ACE</i>                | G/C            | 95        | 0.58                  | 0.60              | 0.66  |
| rs662799   | 11q23      | <i>APOA5</i>              | G/A            | 95        | 0.14                  | 0.13              | 0.75  |
| rs1042031  | 2p23-24    | <i>APOB</i>               | A/G            | 95        | 0.18                  | 0.15              | 0.37  |
| rs429358   | 19q13.2    | <i>APOE</i>               | C/T            | 96        | 0.24                  | 0.23              | 0.79  |
| rs7412     | 19q13.2    | <i>APOE</i>               | C/T            | 97        | 0.91                  | 0.93              | 0.41  |
| rs10757274 | 9p21       | <i>CDKN2A/CDKN2B</i>      | G/A            | 94        | 0.24                  | 0.21              | 0.43  |
| rs599839   | 1p13.3     | <i>CELSR2/PSRC1/SORT1</i> | A/G            | 95        | 0.35                  | 0.25              | 0.015 |
| rs708272   | 16q21      | <i>CETP</i>               | C/T            | 95        | 0.74                  | 0.76              | 0.61  |
| rs1746048  | 10q11.2    | <i>CXCL12</i>             | C/T            | 95        | 0.63                  | 0.53              | 0.028 |
| rs7025486  | 9q33       | <i>DAB2IP</i>             | A/G            | 96        | 0.26                  | 0.32              | 0.15  |
| rs10455872 | 6q26       | <i>LPA</i>                | G/A            | 94        | 0.01                  | 0.01              | NA    |
| rs3798220  | 6q26       | <i>LPA</i>                | C/T            | 96        | 0.01                  | 0.01              | NA    |
| rs1801177  | 8p22       | <i>LPL</i>                | A/G            | 96        | 0                     | 0.001             | 0.88  |
| rs328      | 8p22       | <i>LPL</i>                | C/G            | 97        | 0.94                  | 0.94              | NA    |
| rs17465637 | 1q41       | <i>MIA3</i>               | C/A            | 95        | 0.31                  | 0.24              | 0.08  |
| rs9818870  | 3q23.3     | <i>MRAS</i>               | T/C            | 95        | 0.11                  | 0.08              | 0.25  |
| rs1799983  | 7q35-36    | <i>NOS3</i>               | T/G            | 95        | 0.16                  | 0.12              | 0.2   |
| rs11591147 | 1p32.3     | <i>PSCK9</i>              | G/T            | 94        | 0.99                  | 1                 | NA    |
| rs17228212 | 15q22      | <i>SMAD3</i>              | C/T            | 98        | 0.13                  | 0.12              | 0.74  |

**Supplemental table S2: Association between GRS and CHD in Afro-Caribbeans.**

|                           | <b>Cases<br/>N=178</b> | <b>Controls<br/>N=359</b> | <b>P</b>             |
|---------------------------|------------------------|---------------------------|----------------------|
| <b>Non-weighted GRS19</b> | 13.90 ( $\pm 2.07$ )   | 13.17 ( $\pm 2.10$ )      | $1.6 \times 10^{-4}$ |
| <b>Weighted GRS19</b>     | 1.74 ( $\pm 0.24$ )    | 1.68 ( $\pm 0.20$ )       | $1.4 \times 10^{-2}$ |
| <b>Non-weighted GRS14</b> | 10.28 ( $\pm 1.68$ )   | 9.69 ( $\pm 1.70$ )       | $1.6 \times 10^{-4}$ |
| <b>Weighted GRS14</b>     | 1.66 ( $\pm 0.23$ )    | 1.61 ( $\pm 0.21$ )       | $9 \times 10^{-3}$   |

Data are presented as mean (SD)

**Supplemental table S3: Association between the 19-SNP GRS and cardiovascular risk factors in Afro-Caribbeans without CHD**

| <b>Afro-Caribbean Controls<br/>N=359</b> | <b>Status (number)</b> | <b>Mean weighted GRS</b> | <b>P</b> | <b>Mean non-weighted GRS</b> | <b>P</b> |
|------------------------------------------|------------------------|--------------------------|----------|------------------------------|----------|
| <b>Hypertension</b>                      | No (251)               | 2.54 (0.46)              | 0.21     | 13.08 (2.14)                 | 0.32     |
|                                          | Yes (108)              | 2.61 (0.50)              |          | 13.32 (2.06)                 |          |
| <b>Diabetes</b>                          | No (306)               | 2.56 (0.47)              | 0.94     | 13.18 (2.13)                 | 0.66     |
|                                          | Yes (53)               | 2.56 (0.51)              |          | 13.04 (2.06)                 |          |
| <b>Dyslipidaemia</b>                     | No (305)               | 2.56 (0.46)              | 0.42     | 13.14 (2.10)                 | 0.80     |
|                                          | Yes (54)               | 2.61 (0.56)              |          | 13.22 (2.24)                 |          |
| <b>Smoking</b>                           | No (310)               | 2.57 (0.48)              | 0.83     | 13.15 (2.13)                 | 0.92     |
|                                          | Yes (49)               | 2.55 (0.45)              |          | 13.18 (2.09)                 |          |

Data are presented as number (SD)

**Supplemental table S4: Association between the 19-SNP GRS and cardiovascular risk factors in Afro-Caribbeans with CHD**

| <b>Afro-Caribbean cases<br/>N=178</b> | <b>Status (number)</b> | <b>Mean weighted GRS</b> | <b>P</b> | <b>Mean non-weighted GRS</b> | <b>P</b> |
|---------------------------------------|------------------------|--------------------------|----------|------------------------------|----------|
| <b>Hypertension</b>                   | No (38)                | 2.69 (0.52)              | 0.80     | 13.87 (2.46)                 | 0.92     |
|                                       | Yes (140)              | 2.66 (0.48)              |          | 13.91 (2.09)                 |          |
| <b>Diabetes</b>                       | No (82)                | 2.65 (0.48)              | 0.66     | 13.77 (2.25)                 | 0.46     |
|                                       | Yes (96)               | 2.68 (0.50)              |          | 14.01 (2.11)                 |          |
| <b>Dyslipidaemia</b>                  | No (84)                | 2.59 (0.49)              | 0.04     | 13.40 (2.17)                 | 0.004    |
|                                       | Yes (94)               | 2.74 (0.48)              |          | 14.34 (2.08)                 |          |
| <b>Smoking</b>                        | No (129)               | 2.67 (0.50)              | 0.79     | 13.94 (2.10)                 | 0.70     |
|                                       | Yes (49)               | 2.65 (0.45)              |          | 13.80 (2.35)                 |          |

Data are presented as number (SD)

**Supplemental table S5: Risk allele frequencies of the 19 SNPs in the control group of the two study samples and in other populations of European or African ancestry**

| Gene                | SNP        | Risk Allele | RAF in Caucasians from NPHS ( 95% CI) |             | RAF in Caucasians from HapMAP or 1000 Genomes* | RAF in Afro-Caribbeans (95% CI) |             | RAF in Afro-Caribbeans from 1000 Genomes | RAF in Africans from HapMap or 1000 Genomes* | RAF in African-Americans from 1000 Genomes |
|---------------------|------------|-------------|---------------------------------------|-------------|------------------------------------------------|---------------------------------|-------------|------------------------------------------|----------------------------------------------|--------------------------------------------|
|                     |            |             |                                       |             |                                                |                                 |             |                                          |                                              |                                            |
| ACE                 | rs4341     | G           | 0.52                                  | (0.50-0.53) | 0.49*                                          | 0.60                            | (0.55-0.65) | 0.58                                     | 0.59*                                        | 0.55                                       |
| APOA5               | rs662799   | G           | 0.06                                  | (0.05-0.07) | 0.02                                           | 0.13                            | (0.10-0.17) | 0.16                                     | 0.13                                         | 0.12                                       |
| APOB                | rs1042031  | A           | 0.18                                  | (0.17-0.19) | 0.20                                           | 0.15                            | (0.12-0.19) | 0.17                                     | 0.16                                         | 0.20                                       |
| APOE                | rs429358   | C           | 0.17                                  | (0.16-0.18) | 0.18*                                          | 0.23                            | (0.19-0.28) | 0.25                                     | 0.24*                                        | 0.20                                       |
| APOE                | rs7412     | T           | 0.09                                  | (0.08-0.10) | 0.07                                           | 0.07                            | (0.04-0.10) | 0.12                                     | 0.09                                         | 0.13                                       |
| CDKN2A              | rs10757274 | G           | 0.48                                  | (0.47-0.50) | 0.45                                           | 0.21                            | (0.17-0.25) | 0.19                                     | 0.14                                         | 0.29                                       |
| PSRC1/ <i>SORT1</i> | rs599839   | A           | 0.78                                  | (0.76-0.80) | 0.72                                           | 0.25                            | (0.20-0.30) | 0.25                                     | 0.17                                         | 0.20                                       |
| CETP                | rs708272   | C           | 0.56                                  | (0.53-0.59) | 0.59*                                          | 0.76                            | (0.72-0.80) | 0.75                                     | 0.81*                                        | 0.75                                       |
| CXCL12              | rs1746048  | C           | 0.86                                  | (0.84-0.88) | 0.85                                           | 0.53                            | (0.48-0.58) | 0.44                                     | 0.47                                         | 0.52                                       |
| DAB2IP              | rs7025486  | A           | 0.26                                  | (0.24-0.28) | 0.32                                           | 0.32                            | (0.27-0.37) | 0.33                                     | 0.42                                         | 0.27                                       |
| LPA                 | rs3798220  | C           | 0.02                                  | (0.01-0.03) | 0.03                                           | 0.01                            | (0-0.03)    | 0.00                                     | 0                                            | 0.05                                       |
| LPA                 | rs10455872 | G           | 0.07                                  | (0.07-0.08) | 0.08                                           | 0.01                            | (0-0.03)    | 0.00                                     | 0                                            | 0.02                                       |
| LPL                 | rs328      | C           | 0.90                                  | (0.09-0.11) | 0.88                                           | 0.94                            | (0.91-0.96) | 0.91                                     | 0.97                                         | 0.93                                       |
| LPL                 | rs1801177  | A           | 0.01                                  | (0.01-0.02) | 0.02*                                          | 0.001                           | (0-0.003)   | 0.06                                     | 0.06*                                        | 0.03                                       |
| MIA3                | rs17465637 | C           | 0.71                                  | (0.69-0.72) | 0.73                                           | 0.24                            | (0.20-0.28) | 0.21                                     | 0.15                                         | 0.29                                       |
| MRAS                | rs9818870  | T           | 0.16                                  | (0.15-0.17) | 0.17                                           | 0.08                            | (0.05-0.11) | 0.08                                     | 0.05                                         | 0.10                                       |
| NOS3                | rs1799983  | T           | 0.33                                  | (0.32-0.35) | 0.34                                           | 0.12                            | (0.09-0.15) | 0.08                                     | 0.07                                         | 0.11                                       |
| PCSK9               | rs11591147 | G           | 0.99                                  | (0.99-100)  | 0.97                                           | 1                               | —           | 0.00                                     | 1                                            | 1                                          |
| SMAD3               | rs17228212 | C           | 0.31                                  | (0.30-0.32) | 0.30                                           | 0.12                            | (0.09-0.15) | 0.08                                     | 0.14                                         | 0.12                                       |

Data from HapMap are from HapMap-YRI (Yoruba in Ibadan, Nigeria) for Africans and HapMAP-CEU (western and northern Europe) for Caucasians

Data from 1000 Genomes (marked with an asterix\*) are from British population for Caucasians and Yoruba population in Nigeria for Africans.

For African-Americans, all data are from 1000 genomes (South West USA).

RAF: risk allele frequency

**Supplemental figure S1: Distribution of 19-SNP GRS categories in Afro-Caribbean and Caucasian controls**

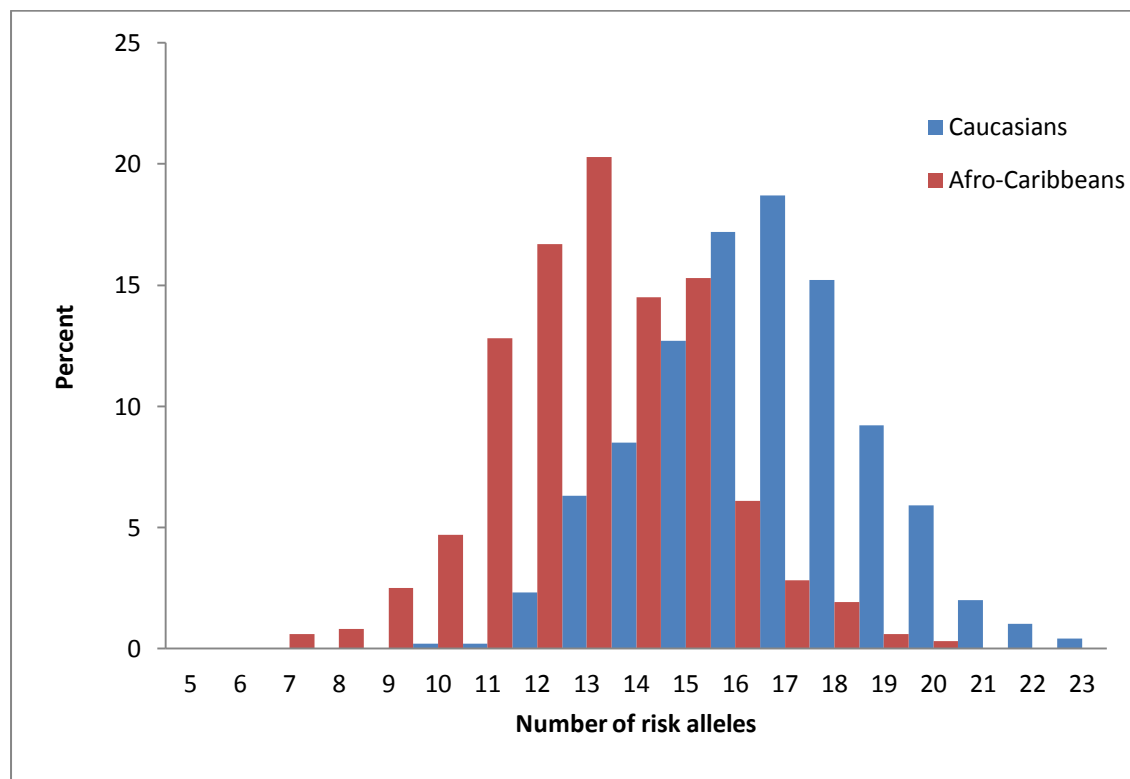

Supplemental figure S2: Incremental contribution of GRS19 to CHD discrimination in Afro-Caribbeans (N=537)

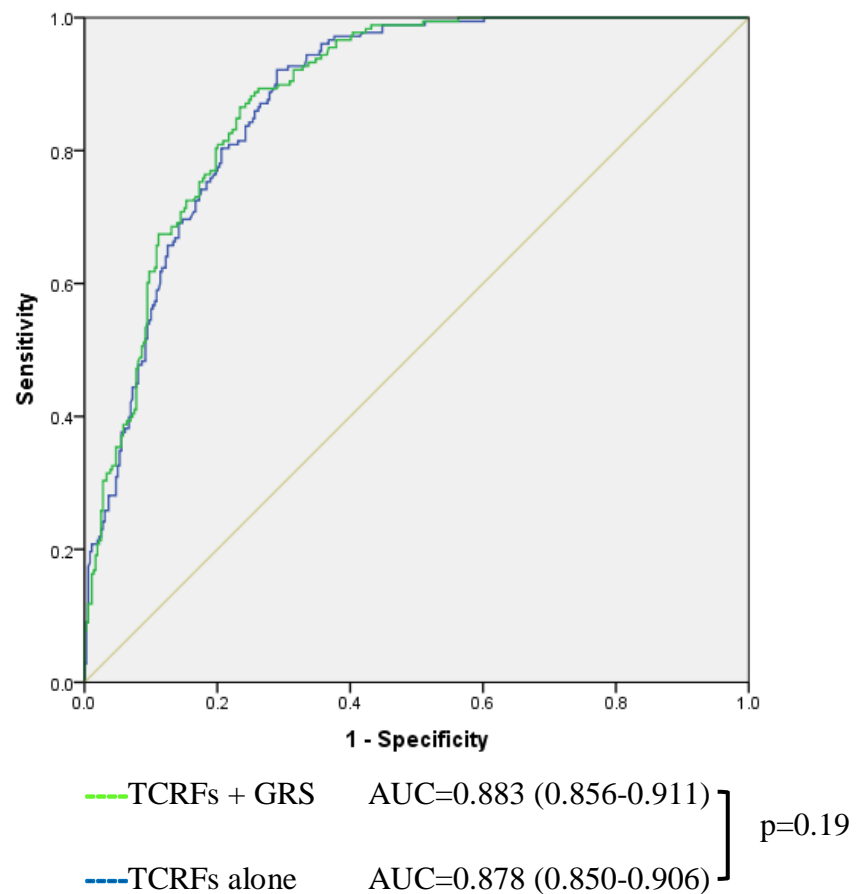

Predictions are based on logistic regression models incorporating TCRFs (age, sex, hypercholesterolemia, diabetes, hypertension, and smoking) alone or with the addition of the non-weighted GRS19.

The area under the curve (AUC) measures the ability of the model to discriminate between subjects with CHD and subjects without CHD
